# Supplementary material for: Robust and air-stable sandwiched organo-lead halide perovskites for photodetector applications
Source: Royal Society of Chemistry journal article supplement (doi:10.1039/c6tc00610h), 2016-01-01
Supplement: c6tc00610h1.pdf [file c6tc00610h1.pdf]

## Supporting Information

# Robust and Air-Stable Sandwiched Organo-Halide Lead Perovskites for Photodetector Applications

Banavoth Murali<sup>†</sup>, Makhsud I. Saidaminov<sup>†</sup>, Ahmed L. Abdelhady, Wei Peng, Jiakai Liu, Jun Pan, Osman M. Bakr\*, Omar F. Mohammed\*

*Physical Sciences and Engineering Division, Solar and Photovoltaics Engineering Research Center (SPERC), King Abdullah University of Science and Technology (KAUST), Thuwal, 23955-6900, Saudi Arabia*

\* Prof. Omar F. Mohammed (Corresponding Author)

E-mail: [omar.abdelsaboor@kaust.edu.sa](mailto:omar.abdelsaboor@kaust.edu.sa)

\* Prof. Osman Bakr (Corresponding Author)

E-mail: [osman.bakr@kaust.edu.sa](mailto:osman.bakr@kaust.edu.sa)

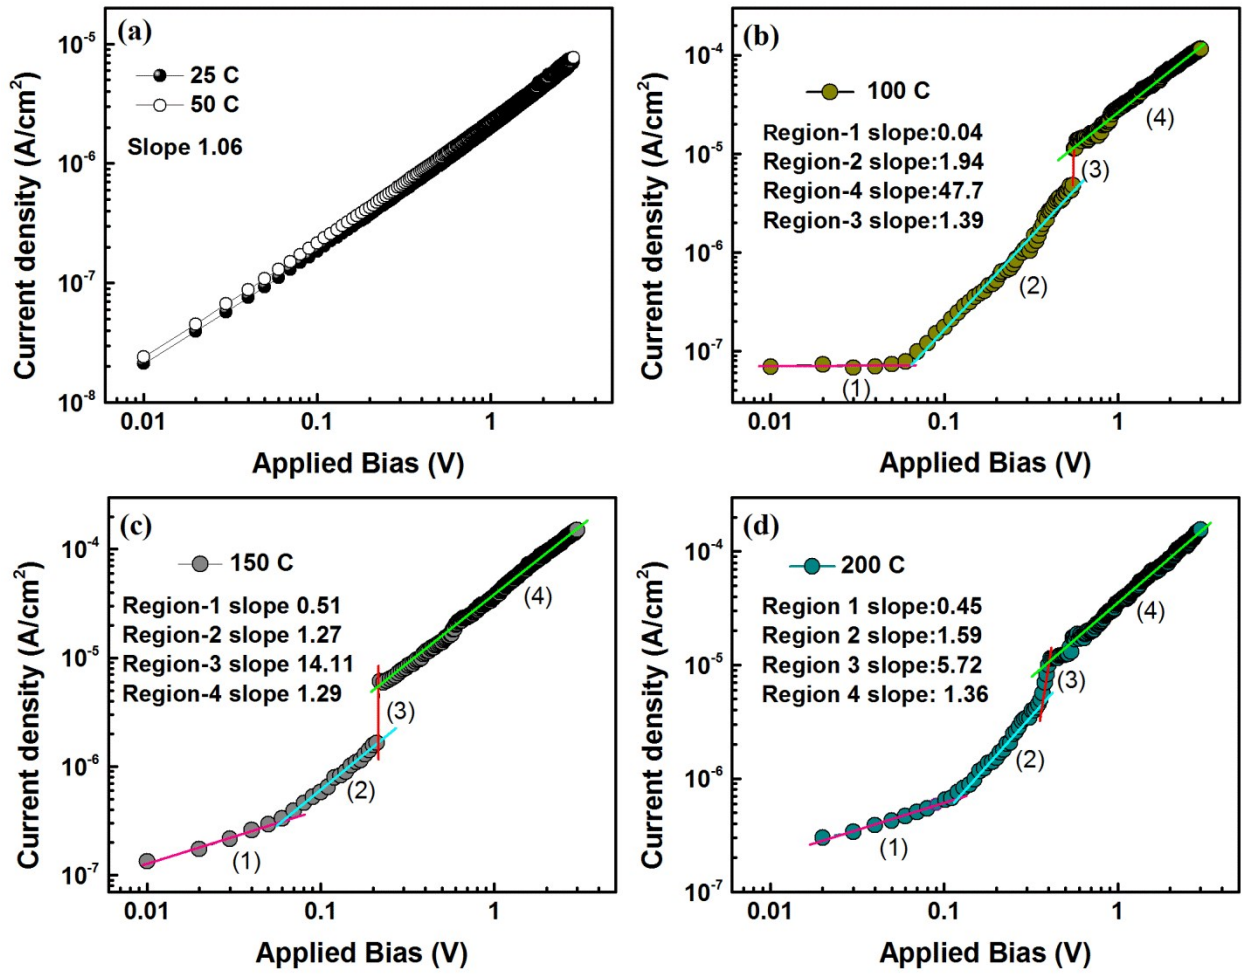

**Fig. S1.** Temperature dependent current ( $\log J$ )-voltage ( $\log V$ ) characteristics, showing the various conduction mechanisms with varied slopes in the respective regions of applied bias in the case of homojunction (MAPbI<sub>3</sub>-MAPbI<sub>3</sub>).

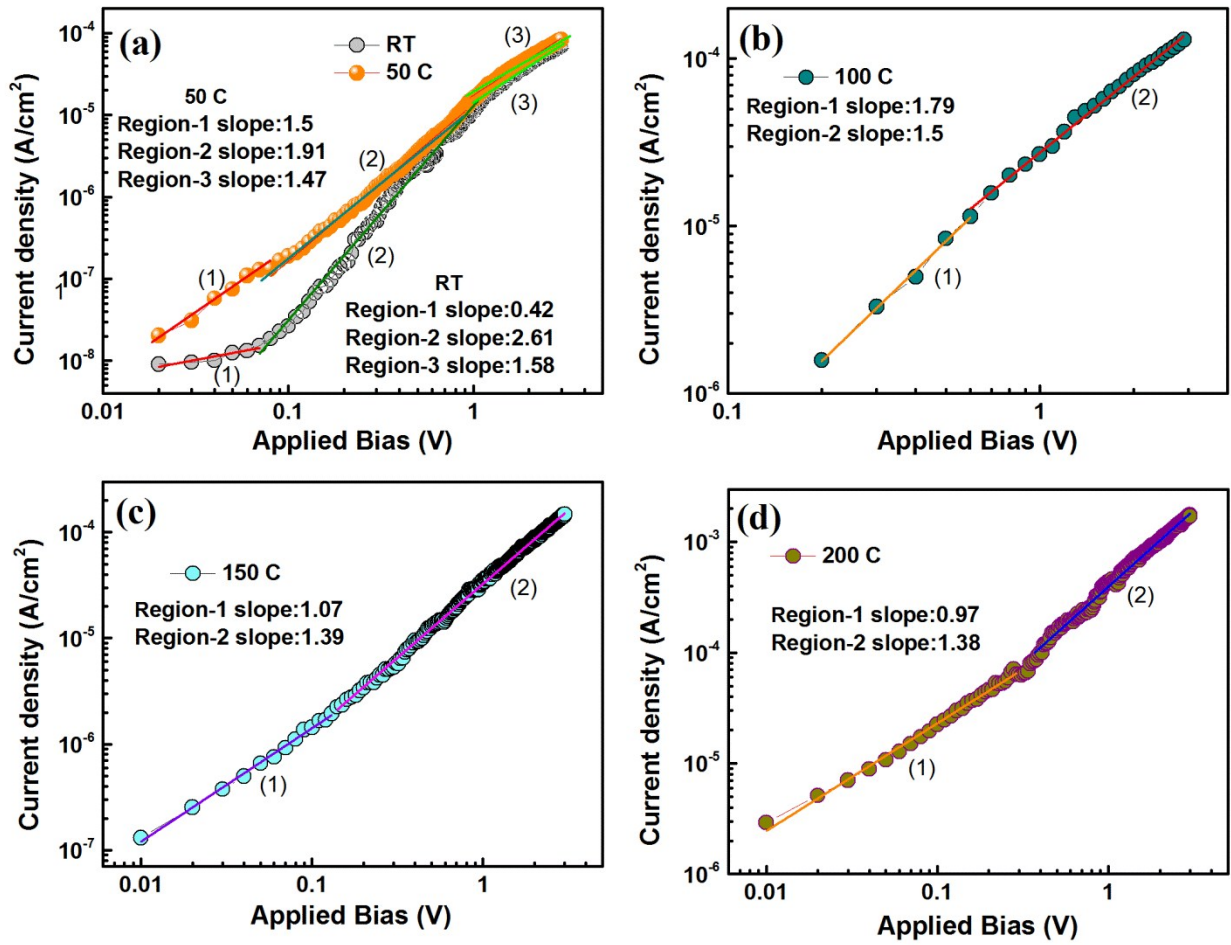

**Fig. S2.** Temperature dependent current ( $\log J$ )-voltage ( $\log V$ ) characteristics, showing the various conduction mechanisms with varied slopes in the respective regions of applied bias in the case of heterojunction (MAPbI<sub>3</sub>-MAPbBr<sub>3</sub>).
